# Supplementary material for: Augmenting a training dataset of the generative diffusion model for molecular docking with artificial binding pockets
Source: Royal Society of Chemistry journal article supplement (doi:10.1039/d3ra08147h), 2024-01-01
Supplement: d3ra08147h1.pdf [file d3ra08147h1.pdf]

# Boosting performance of generative diffusion model for molecular docking by training on artificial binding pockets

## Supporting Information

Taras Voitsitskyi, Volodymyr Bdzhola, Roman Stratiichuk, Ihor Koleiev, Zakhar Ostrovsky, Volodymyr Vozniak, Ivan Khropachov, Pavlo Henitsoi, Leonid Popryho, Roman Zhytar, Semen Yesylevskyy, Alan Nafiev, Serhii Starosyla

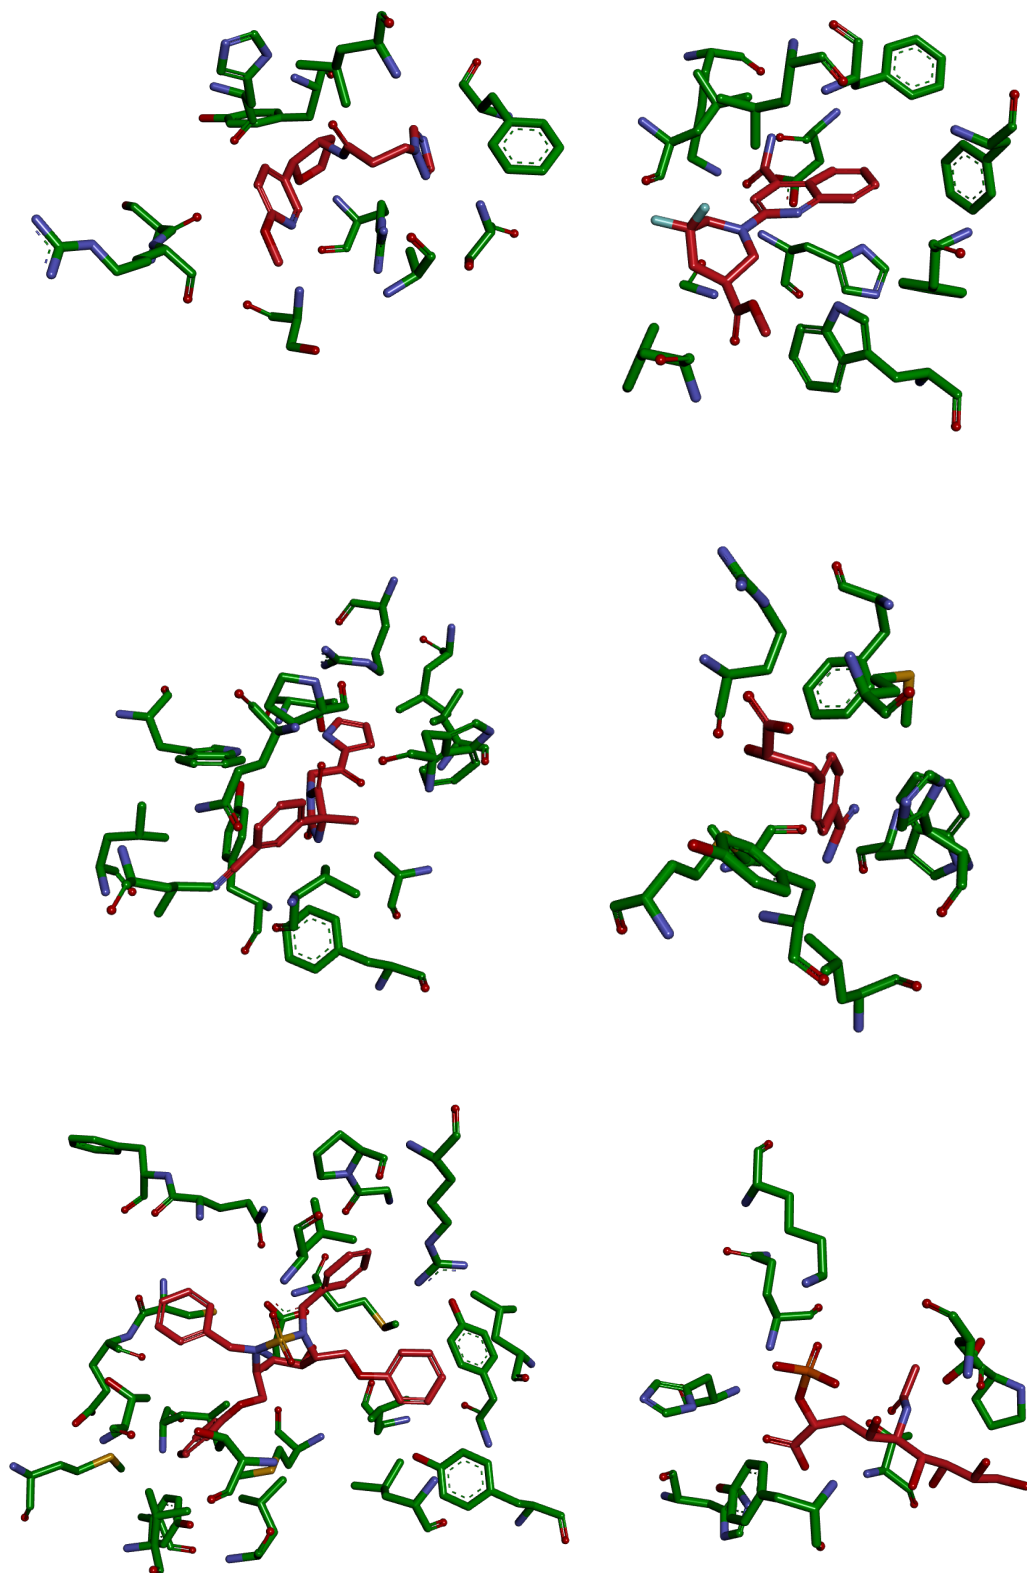

**Figure S1.** Examples of randomly selected artificial pockets (green) with the corresponding ligands (red).

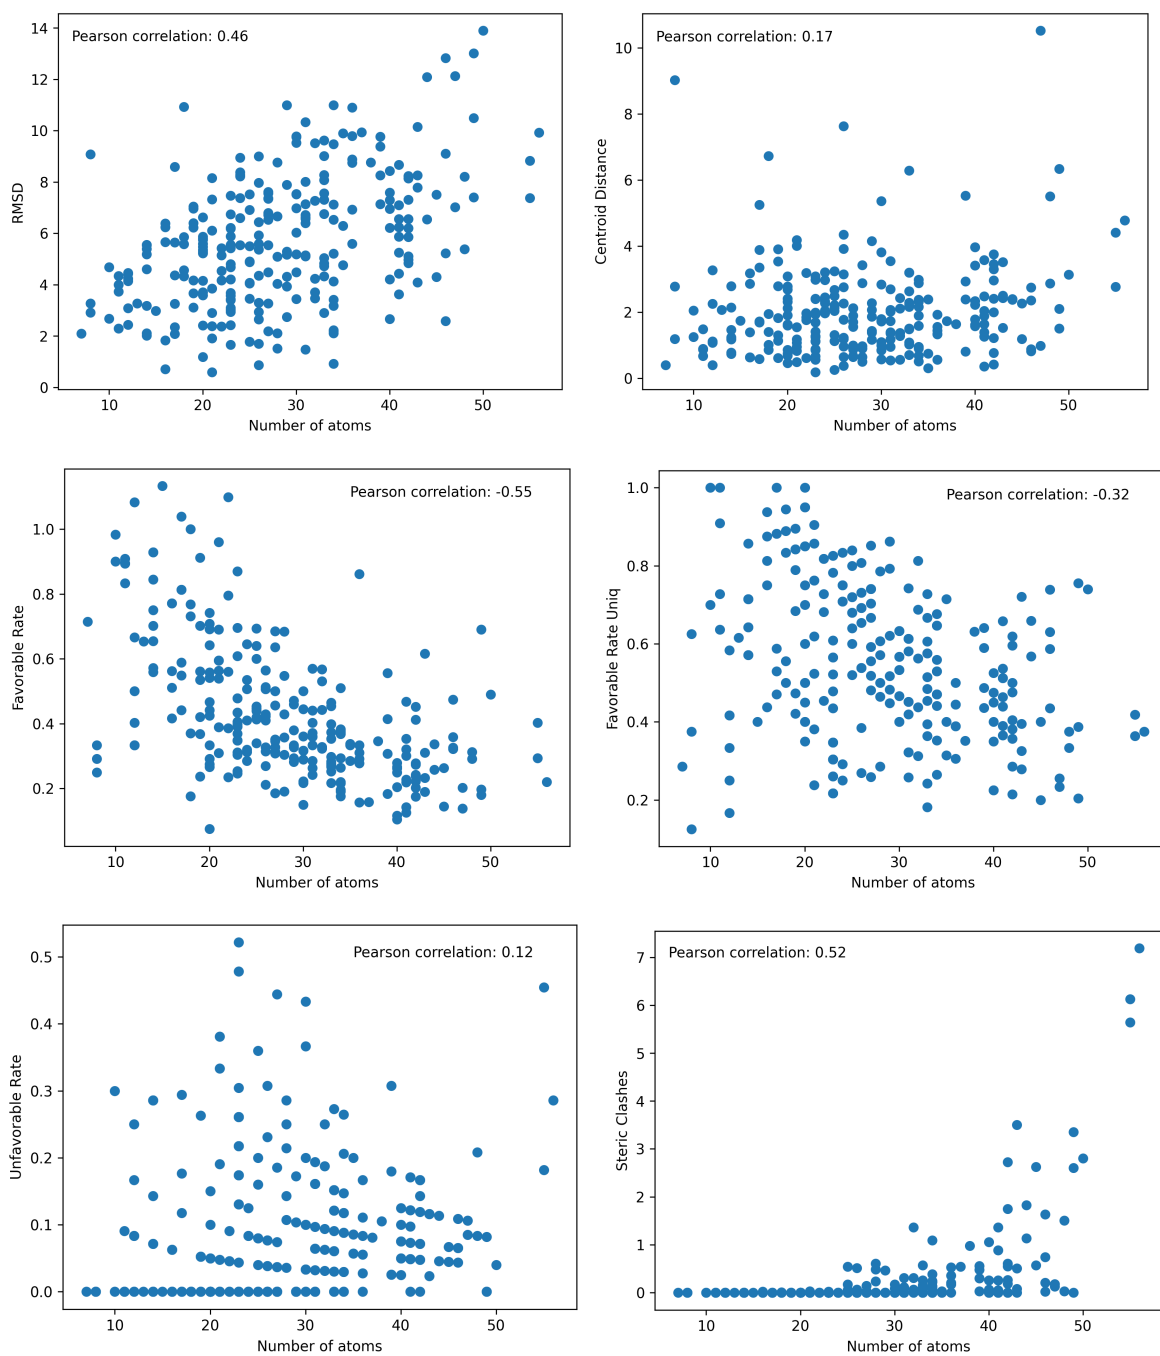

**Figure S2.** Correlation between the ligand heavy atom count and different evaluation metrics. The results are reported for the top-1 sample out of 40 predicted in the PDBbind test data.

**Table S1.** Characterisation of atoms in PDB residues.

| Residue Name | Atom Name | Hybridization | N Heavy Neighbors | Is Backbone | Is Hydrophobe | Is Donor | H | Is Weak H Donor | Is Acceptor | H | Is Positive | Is Negative | Is Aromatic |
|--------------|-----------|---------------|-------------------|-------------|---------------|----------|---|-----------------|-------------|---|-------------|-------------|-------------|
| ALA          | C         | SP2           | 3                 | 1           | 0             | 0        | 0 | 0               | 0           | 0 | 0           | 0           | 0           |
| ALA          | CA        | SP3           | 3                 | 1           | 0             | 0        | 0 | 1               | 0           | 0 | 0           | 0           | 0           |
| ALA          | CB        | SP3           | 1                 | 0           | 1             | 0        | 0 | 1               | 0           | 0 | 0           | 0           | 0           |
| ALA          | N         | SP2           | 2                 | 1           | 0             | 1        | 0 | 0               | 0           | 0 | 0           | 0           | 0           |
| ALA          | O         | SP2           | 1                 | 1           | 0             | 0        | 0 | 0               | 1           | 0 | 0           | 0           | 0           |
| ALA          | OXT       | SP2           | 1                 | 1           | 0             | 0        | 0 | 0               | 1           | 0 | 1           | 0           | 0           |
| ARG          | C         | SP2           | 3                 | 1           | 0             | 0        | 0 | 0               | 0           | 0 | 0           | 0           | 0           |
| ARG          | CA        | SP3           | 3                 | 1           | 0             | 0        | 0 | 1               | 0           | 0 | 0           | 0           | 0           |
| ARG          | CB        | SP3           | 2                 | 0           | 1             | 0        | 0 | 1               | 0           | 0 | 0           | 0           | 0           |
| ARG          | CD        | SP3           | 2                 | 0           | 0             | 0        | 0 | 1               | 0           | 0 | 0           | 0           | 0           |
| ARG          | CG        | SP3           | 2                 | 0           | 1             | 0        | 0 | 1               | 0           | 0 | 0           | 0           | 0           |
| ARG          | CZ        | SP2           | 3                 | 0           | 0             | 0        | 0 | 0               | 0           | 0 | 0           | 0           | 0           |
| ARG          | N         | SP2           | 2                 | 1           | 0             | 1        | 0 | 0               | 0           | 0 | 0           | 0           | 0           |
| ARG          | NE        | SP2           | 2                 | 0           | 0             | 1        | 0 | 0               | 0           | 1 | 0           | 0           | 0           |
| ARG          | NH1       | SP2           | 1                 | 0           | 0             | 1        | 0 | 0               | 0           | 1 | 0           | 0           | 0           |
| ARG          | NH2       | SP2           | 1                 | 0           | 0             | 1        | 0 | 0               | 0           | 1 | 0           | 0           | 0           |
| ARG          | O         | SP2           | 1                 | 1           | 0             | 0        | 0 | 0               | 1           | 0 | 0           | 0           | 0           |
| ARG          | OXT       | SP2           | 1                 | 1           | 0             | 0        | 0 | 0               | 1           | 0 | 1           | 0           | 0           |
| ASN          | C         | SP2           | 3                 | 1           | 0             | 0        | 0 | 0               | 0           | 0 | 0           | 0           | 0           |
| ASN          | CA        | SP3           | 3                 | 1           | 0             | 0        | 0 | 1               | 0           | 0 | 0           | 0           | 0           |
| ASN          | CB        | SP3           | 2                 | 0           | 1             | 0        | 0 | 1               | 0           | 0 | 0           | 0           | 0           |
| ASN          | CG        | SP2           | 3                 | 0           | 0             | 0        | 0 | 0               | 0           | 0 | 0           | 0           | 0           |
| ASN          | N         | SP2           | 2                 | 1           | 0             | 1        | 0 | 0               | 0           | 0 | 0           | 0           | 0           |
| ASN          | ND2       | SP2           | 1                 | 0           | 0             | 1        | 0 | 0               | 0           | 0 | 0           | 0           | 0           |
| ASN          | O         | SP2           | 1                 | 1           | 0             | 0        | 0 | 0               | 1           | 0 | 0           | 0           | 0           |
| ASN          | OD1       | SP2           | 1                 | 0           | 0             | 0        | 0 | 0               | 1           | 0 | 0           | 0           | 0           |
| ASN          | OXT       | SP2           | 1                 | 1           | 0             | 0        | 0 | 0               | 1           | 0 | 1           | 0           | 0           |
| ASP          | C         | SP2           | 3                 | 1           | 0             | 0        | 0 | 0               | 0           | 0 | 0           | 0           | 0           |
| ASP          | CA        | SP3           | 3                 | 1           | 0             | 0        | 0 | 1               | 0           | 0 | 0           | 0           | 0           |
| ASP          | CB        | SP3           | 2                 | 0           | 1             | 0        | 0 | 1               | 0           | 0 | 0           | 0           | 0           |
| ASP          | CG        | SP2           | 3                 | 0           | 0             | 0        | 0 | 0               | 0           | 0 | 0           | 0           | 0           |
| ASP          | N         | SP2           | 2                 | 1           | 0             | 1        | 0 | 0               | 0           | 0 | 0           | 0           | 0           |
| ASP          | O         | SP2           | 1                 | 1           | 0             | 0        | 0 | 0               | 1           | 0 | 0           | 0           | 0           |
| ASP          | OD1       | SP2           | 1                 | 0           | 0             | 0        | 0 | 0               | 1           | 0 | 1           | 0           | 0           |

|     |     |     |   |   |   |   |   |   |   |   |   |
|-----|-----|-----|---|---|---|---|---|---|---|---|---|
| ASP | OD2 | SP2 | 1 | 0 | 0 | 0 | 0 | 1 | 0 | 1 | 0 |
| ASP | OXT | SP2 | 1 | 1 | 0 | 0 | 0 | 1 | 0 | 1 | 0 |
| CYS | C   | SP2 | 3 | 1 | 0 | 0 | 0 | 0 | 0 | 0 | 0 |
| CYS | CA  | SP3 | 3 | 1 | 0 | 0 | 1 | 0 | 0 | 0 | 0 |
| CYS | CB  | SP3 | 2 | 0 | 1 | 0 | 1 | 0 | 0 | 0 | 0 |
| CYS | N   | SP2 | 2 | 1 | 0 | 1 | 0 | 0 | 0 | 0 | 0 |
| CYS | O   | SP2 | 1 | 1 | 0 | 0 | 0 | 1 | 0 | 0 | 0 |
| CYS | OXT | SP2 | 1 | 1 | 0 | 0 | 0 | 1 | 0 | 1 | 0 |
| CYS | SG  | SP3 | 1 | 0 | 0 | 0 | 1 | 0 | 0 | 0 | 0 |
| GLN | C   | SP2 | 3 | 1 | 0 | 0 | 0 | 0 | 0 | 0 | 0 |
| GLN | CA  | SP3 | 3 | 1 | 0 | 0 | 1 | 0 | 0 | 0 | 0 |
| GLN | CB  | SP3 | 2 | 0 | 1 | 0 | 1 | 0 | 0 | 0 | 0 |
| GLN | CD  | SP2 | 3 | 0 | 0 | 0 | 0 | 0 | 0 | 0 | 0 |
| GLN | CG  | SP3 | 2 | 0 | 1 | 0 | 1 | 0 | 0 | 0 | 0 |
| GLN | N   | SP2 | 2 | 1 | 0 | 1 | 0 | 0 | 0 | 0 | 0 |
| GLN | NE2 | SP2 | 1 | 0 | 0 | 1 | 0 | 0 | 0 | 0 | 0 |
| GLN | O   | SP2 | 1 | 1 | 0 | 0 | 0 | 1 | 0 | 0 | 0 |
| GLN | OE1 | SP2 | 1 | 0 | 0 | 0 | 0 | 1 | 0 | 0 | 0 |
| GLN | OXT | SP2 | 1 | 1 | 0 | 0 | 0 | 1 | 0 | 1 | 0 |
| GLU | C   | SP2 | 3 | 1 | 0 | 0 | 0 | 0 | 0 | 0 | 0 |
| GLU | CA  | SP3 | 3 | 1 | 0 | 0 | 1 | 0 | 0 | 0 | 0 |
| GLU | CB  | SP3 | 2 | 0 | 1 | 0 | 1 | 0 | 0 | 0 | 0 |
| GLU | CD  | SP2 | 3 | 0 | 0 | 0 | 0 | 0 | 0 | 0 | 0 |
| GLU | CG  | SP3 | 2 | 0 | 1 | 0 | 1 | 0 | 0 | 0 | 0 |
| GLU | N   | SP2 | 2 | 1 | 0 | 1 | 0 | 0 | 0 | 0 | 0 |
| GLU | O   | SP2 | 1 | 1 | 0 | 0 | 0 | 1 | 0 | 0 | 0 |
| GLU | OE1 | SP2 | 1 | 0 | 0 | 0 | 0 | 1 | 0 | 1 | 0 |
| GLU | OE2 | SP2 | 1 | 0 | 0 | 0 | 0 | 1 | 0 | 1 | 0 |
| GLU | OXT | SP2 | 1 | 1 | 0 | 0 | 0 | 1 | 0 | 1 | 0 |
| GLY | C   | SP2 | 3 | 1 | 0 | 0 | 0 | 0 | 0 | 0 | 0 |
| GLY | CA  | SP3 | 2 | 1 | 0 | 0 | 1 | 0 | 0 | 0 | 0 |
| GLY | N   | SP2 | 2 | 1 | 0 | 1 | 0 | 0 | 0 | 0 | 0 |
| GLY | O   | SP2 | 1 | 1 | 0 | 0 | 0 | 1 | 0 | 0 | 0 |
| GLY | OXT | SP2 | 1 | 1 | 0 | 0 | 0 | 1 | 0 | 1 | 0 |
| HIS | C   | SP2 | 3 | 1 | 0 | 0 | 0 | 0 | 0 | 0 | 0 |
| HIS | CA  | SP3 | 3 | 1 | 0 | 0 | 1 | 0 | 0 | 0 | 0 |
| HIS | CB  | SP3 | 2 | 0 | 1 | 0 | 1 | 0 | 0 | 0 | 0 |

|     |     |     |   |   |   |   |   |   |   |   |   |
|-----|-----|-----|---|---|---|---|---|---|---|---|---|
| HIS | CD2 | SP2 | 2 | 0 | 0 | 0 | 0 | 0 | 0 | 0 | 1 |
| HIS | CE1 | SP2 | 2 | 0 | 0 | 0 | 0 | 0 | 0 | 0 | 1 |
| HIS | CG  | SP2 | 3 | 0 | 0 | 0 | 0 | 0 | 0 | 0 | 1 |
| HIS | N   | SP2 | 2 | 1 | 0 | 1 | 0 | 0 | 0 | 0 | 0 |
| HIS | ND1 | SP2 | 2 | 0 | 0 | 1 | 0 | 1 | 1 | 0 | 1 |
| HIS | NE2 | SP2 | 2 | 0 | 0 | 1 | 0 | 1 | 1 | 0 | 1 |
| HIS | O   | SP2 | 1 | 1 | 0 | 0 | 0 | 1 | 0 | 0 | 0 |
| HIS | OXT | SP2 | 1 | 1 | 0 | 0 | 0 | 1 | 0 | 1 | 0 |
| ILE | C   | SP2 | 3 | 1 | 0 | 0 | 0 | 0 | 0 | 0 | 0 |
| ILE | CA  | SP3 | 3 | 1 | 0 | 0 | 1 | 0 | 0 | 0 | 0 |
| ILE | CB  | SP3 | 3 | 0 | 1 | 0 | 1 | 0 | 0 | 0 | 0 |
| ILE | CD1 | SP3 | 1 | 0 | 1 | 0 | 1 | 0 | 0 | 0 | 0 |
| ILE | CG1 | SP3 | 2 | 0 | 1 | 0 | 1 | 0 | 0 | 0 | 0 |
| ILE | CG2 | SP3 | 1 | 0 | 1 | 0 | 1 | 0 | 0 | 0 | 0 |
| ILE | N   | SP2 | 2 | 1 | 0 | 1 | 0 | 0 | 0 | 0 | 0 |
| ILE | O   | SP2 | 1 | 1 | 0 | 0 | 0 | 1 | 0 | 0 | 0 |
| ILE | OXT | SP2 | 1 | 1 | 0 | 0 | 0 | 1 | 0 | 1 | 0 |
| LEU | C   | SP2 | 3 | 1 | 0 | 0 | 0 | 0 | 0 | 0 | 0 |
| LEU | CA  | SP3 | 3 | 1 | 0 | 0 | 1 | 0 | 0 | 0 | 0 |
| LEU | CB  | SP3 | 2 | 0 | 1 | 0 | 1 | 0 | 0 | 0 | 0 |
| LEU | CD1 | SP3 | 1 | 0 | 1 | 0 | 1 | 0 | 0 | 0 | 0 |
| LEU | CD2 | SP3 | 1 | 0 | 1 | 0 | 1 | 0 | 0 | 0 | 0 |
| LEU | CG  | SP3 | 3 | 0 | 1 | 0 | 1 | 0 | 0 | 0 | 0 |
| LEU | N   | SP2 | 2 | 1 | 0 | 1 | 0 | 0 | 0 | 0 | 0 |
| LEU | O   | SP2 | 1 | 1 | 0 | 0 | 0 | 1 | 0 | 0 | 0 |
| LEU | OXT | SP2 | 1 | 1 | 0 | 0 | 0 | 1 | 0 | 1 | 0 |
| LYS | C   | SP2 | 3 | 1 | 0 | 0 | 0 | 0 | 0 | 0 | 0 |
| LYS | CA  | SP3 | 3 | 1 | 0 | 0 | 1 | 0 | 0 | 0 | 0 |
| LYS | CB  | SP3 | 2 | 0 | 1 | 0 | 1 | 0 | 0 | 0 | 0 |
| LYS | CD  | SP3 | 2 | 0 | 1 | 0 | 1 | 0 | 0 | 0 | 0 |
| LYS | CE  | SP3 | 2 | 0 | 0 | 0 | 1 | 0 | 0 | 0 | 0 |
| LYS | CG  | SP3 | 2 | 0 | 1 | 0 | 1 | 0 | 0 | 0 | 0 |
| LYS | N   | SP2 | 2 | 1 | 0 | 1 | 0 | 0 | 0 | 0 | 0 |
| LYS | NZ  | SP3 | 1 | 0 | 0 | 1 | 0 | 0 | 1 | 0 | 0 |
| LYS | O   | SP2 | 1 | 1 | 0 | 0 | 0 | 1 | 0 | 0 | 0 |
| LYS | OXT | SP2 | 1 | 1 | 0 | 0 | 0 | 1 | 0 | 1 | 0 |
| MET | C   | SP2 | 3 | 1 | 0 | 0 | 0 | 0 | 0 | 0 | 0 |

|     |     |     |   |   |   |   |   |   |   |   |   |
|-----|-----|-----|---|---|---|---|---|---|---|---|---|
| MET | CA  | SP3 | 3 | 1 | 0 | 0 | 1 | 0 | 0 | 0 | 0 |
| MET | CB  | SP3 | 2 | 0 | 1 | 0 | 1 | 0 | 0 | 0 | 0 |
| MET | CE  | SP3 | 1 | 0 | 1 | 0 | 1 | 0 | 0 | 0 | 0 |
| MET | CG  | SP3 | 2 | 0 | 1 | 0 | 1 | 0 | 0 | 0 | 0 |
| MET | N   | SP2 | 2 | 1 | 0 | 1 | 0 | 0 | 0 | 0 | 0 |
| MET | O   | SP2 | 1 | 1 | 0 | 0 | 0 | 1 | 0 | 0 | 0 |
| MET | OXT | SP2 | 1 | 1 | 0 | 0 | 0 | 1 | 0 | 1 | 0 |
| MET | SD  | SP3 | 2 | 0 | 1 | 0 | 0 | 0 | 0 | 0 | 0 |
| PHE | C   | SP2 | 3 | 1 | 0 | 0 | 0 | 0 | 0 | 0 | 0 |
| PHE | CA  | SP3 | 3 | 1 | 0 | 0 | 1 | 0 | 0 | 0 | 0 |
| PHE | CB  | SP3 | 2 | 0 | 1 | 0 | 1 | 0 | 0 | 0 | 0 |
| PHE | CD1 | SP2 | 2 | 0 | 1 | 0 | 1 | 0 | 0 | 0 | 1 |
| PHE | CD2 | SP2 | 2 | 0 | 1 | 0 | 1 | 0 | 0 | 0 | 1 |
| PHE | CE1 | SP2 | 2 | 0 | 1 | 0 | 1 | 0 | 0 | 0 | 1 |
| PHE | CE2 | SP2 | 2 | 0 | 1 | 0 | 1 | 0 | 0 | 0 | 1 |
| PHE | CG  | SP2 | 3 | 0 | 1 | 0 | 0 | 0 | 0 | 0 | 1 |
| PHE | CZ  | SP2 | 2 | 0 | 1 | 0 | 1 | 0 | 0 | 0 | 1 |
| PHE | N   | SP2 | 2 | 1 | 0 | 1 | 0 | 0 | 0 | 0 | 0 |
| PHE | O   | SP2 | 1 | 1 | 0 | 0 | 0 | 1 | 0 | 0 | 0 |
| PHE | OXT | SP2 | 1 | 1 | 0 | 0 | 0 | 1 | 0 | 1 | 0 |
| PRO | C   | SP2 | 3 | 1 | 0 | 0 | 0 | 0 | 0 | 0 | 0 |
| PRO | CA  | SP3 | 3 | 1 | 0 | 0 | 1 | 0 | 0 | 0 | 0 |
| PRO | CB  | SP3 | 2 | 0 | 1 | 0 | 1 | 0 | 0 | 0 | 0 |
| PRO | CD  | SP3 | 2 | 0 | 0 | 0 | 1 | 0 | 0 | 0 | 0 |
| PRO | CG  | SP3 | 2 | 0 | 1 | 0 | 1 | 0 | 0 | 0 | 0 |
| PRO | N   | SP2 | 3 | 1 | 0 | 0 | 0 | 0 | 0 | 0 | 0 |
| PRO | O   | SP2 | 1 | 1 | 0 | 0 | 0 | 1 | 0 | 0 | 0 |
| PRO | OXT | SP2 | 1 | 1 | 0 | 0 | 0 | 1 | 0 | 1 | 0 |
| SER | C   | SP2 | 3 | 1 | 0 | 0 | 0 | 0 | 0 | 0 | 0 |
| SER | CA  | SP3 | 3 | 1 | 0 | 0 | 1 | 0 | 0 | 0 | 0 |
| SER | CB  | SP3 | 2 | 0 | 0 | 0 | 1 | 0 | 0 | 0 | 0 |
| SER | N   | SP2 | 2 | 1 | 0 | 1 | 0 | 0 | 0 | 0 | 0 |
| SER | O   | SP2 | 1 | 1 | 0 | 0 | 0 | 1 | 0 | 0 | 0 |
| SER | OG  | SP3 | 1 | 0 | 0 | 1 | 0 | 1 | 0 | 0 | 0 |
| SER | OXT | SP2 | 1 | 1 | 0 | 0 | 0 | 1 | 0 | 1 | 0 |
| THR | C   | SP2 | 3 | 1 | 0 | 0 | 0 | 0 | 0 | 0 | 0 |
| THR | CA  | SP3 | 3 | 1 | 0 | 0 | 1 | 0 | 0 | 0 | 0 |

|     |     |     |   |   |   |   |   |   |   |   |   |
|-----|-----|-----|---|---|---|---|---|---|---|---|---|
| THR | CB  | SP3 | 3 | 0 | 0 | 0 | 1 | 0 | 0 | 0 | 0 |
| THR | CG2 | SP3 | 1 | 0 | 1 | 0 | 1 | 0 | 0 | 0 | 0 |
| THR | N   | SP2 | 2 | 1 | 0 | 1 | 0 | 0 | 0 | 0 | 0 |
| THR | O   | SP2 | 1 | 1 | 0 | 0 | 0 | 1 | 0 | 0 | 0 |
| THR | OG1 | SP3 | 1 | 0 | 0 | 1 | 0 | 1 | 0 | 0 | 0 |
| THR | OXT | SP2 | 1 | 1 | 0 | 0 | 0 | 1 | 0 | 1 | 0 |
| TRP | C   | SP2 | 3 | 1 | 0 | 0 | 0 | 0 | 0 | 0 | 0 |
| TRP | CA  | SP3 | 3 | 1 | 0 | 0 | 1 | 0 | 0 | 0 | 0 |
| TRP | CB  | SP3 | 2 | 0 | 1 | 0 | 1 | 0 | 0 | 0 | 0 |
| TRP | CD1 | SP2 | 2 | 0 | 0 | 0 | 1 | 0 | 0 | 0 | 1 |
| TRP | CD2 | SP2 | 3 | 0 | 1 | 0 | 0 | 0 | 0 | 0 | 1 |
| TRP | CE2 | SP2 | 3 | 0 | 0 | 0 | 0 | 0 | 0 | 0 | 1 |
| TRP | CE3 | SP2 | 2 | 0 | 1 | 0 | 1 | 0 | 0 | 0 | 1 |
| TRP | CG  | SP2 | 3 | 0 | 1 | 0 | 0 | 0 | 0 | 0 | 1 |
| TRP | CH2 | SP2 | 2 | 0 | 1 | 0 | 1 | 0 | 0 | 0 | 1 |
| TRP | CZ2 | SP2 | 2 | 0 | 1 | 0 | 1 | 0 | 0 | 0 | 1 |
| TRP | CZ3 | SP2 | 2 | 0 | 1 | 0 | 1 | 0 | 0 | 0 | 1 |
| TRP | N   | SP2 | 2 | 1 | 0 | 1 | 0 | 0 | 0 | 0 | 0 |
| TRP | NE1 | SP2 | 2 | 0 | 0 | 1 | 0 | 0 | 0 | 0 | 1 |
| TRP | O   | SP2 | 1 | 1 | 0 | 0 | 0 | 1 | 0 | 0 | 0 |
| TRP | OXT | SP2 | 1 | 1 | 0 | 0 | 0 | 1 | 0 | 1 | 0 |
| TYR | C   | SP2 | 3 | 1 | 0 | 0 | 0 | 0 | 0 | 0 | 0 |
| TYR | CA  | SP3 | 3 | 1 | 0 | 0 | 1 | 0 | 0 | 0 | 0 |
| TYR | CB  | SP3 | 2 | 0 | 1 | 0 | 1 | 0 | 0 | 0 | 0 |
| TYR | CD1 | SP2 | 2 | 0 | 1 | 0 | 1 | 0 | 0 | 0 | 1 |
| TYR | CD2 | SP2 | 2 | 0 | 1 | 0 | 1 | 0 | 0 | 0 | 1 |
| TYR | CE1 | SP2 | 2 | 0 | 1 | 0 | 1 | 0 | 0 | 0 | 1 |
| TYR | CE2 | SP2 | 2 | 0 | 1 | 0 | 1 | 0 | 0 | 0 | 1 |
| TYR | CG  | SP2 | 3 | 0 | 1 | 0 | 0 | 0 | 0 | 0 | 1 |
| TYR | CZ  | SP2 | 3 | 0 | 0 | 0 | 0 | 0 | 0 | 0 | 1 |
| TYR | N   | SP2 | 2 | 1 | 0 | 1 | 0 | 0 | 0 | 0 | 0 |
| TYR | O   | SP2 | 1 | 1 | 0 | 0 | 0 | 1 | 0 | 0 | 0 |
| TYR | OH  | SP2 | 1 | 0 | 0 | 1 | 0 | 1 | 0 | 0 | 0 |
| TYR | OXT | SP2 | 1 | 1 | 0 | 0 | 0 | 1 | 0 | 1 | 0 |
| VAL | C   | SP2 | 3 | 1 | 0 | 0 | 0 | 0 | 0 | 0 | 0 |
| VAL | CA  | SP3 | 3 | 1 | 0 | 0 | 1 | 0 | 0 | 0 | 0 |
| VAL | CB  | SP3 | 3 | 0 | 1 | 0 | 1 | 0 | 0 | 0 | 0 |



|     |     |     |   |   |   |   |   |   |   |   |   |
|-----|-----|-----|---|---|---|---|---|---|---|---|---|
| VAL | CG1 | SP3 | 1 | 0 | 1 | 0 | 1 | 0 | 0 | 0 | 0 |
| VAL | CG2 | SP3 | 1 | 0 | 1 | 0 | 1 | 0 | 0 | 0 | 0 |
| VAL | N   | SP2 | 2 | 1 | 0 | 1 | 0 | 0 | 0 | 0 | 0 |
| VAL | O   | SP2 | 1 | 1 | 0 | 0 | 0 | 1 | 0 | 0 | 0 |
| VAL | OXT | SP2 | 1 | 1 | 0 | 0 | 0 | 1 | 0 | 1 | 0 |

**Table S2.** Probabilities of the ligand atom, aromatic ring or amide group participation in the non-covalent interactions in the PDBbind complexes.

| Protein           | Ligand                 | Fraction | N interactions | N interacting uniq ligand elements | N compatible uniq ligand elements | Ligand element interaction probability | Avg n of ligand interactions per element |
|-------------------|------------------------|----------|----------------|------------------------------------|-----------------------------------|----------------------------------------|------------------------------------------|
| Hydrophobe (C, S) | Hydrophobe (C, S)      | 74.70%   | 255262         | 81217                              | 98390                             | 0.83                                   | 3.14                                     |
| Hydrophobe (C, S) | Hydrophobe (Cl, Br, I) | 2.76%    | 9423           | 1932                               | 2043                              | 0.95                                   | 4.88                                     |
| Hydrophobe (C, S) | Hydrophobe (F)         | 0.90%    | 3089           | 1339                               | 1737                              | 0.77                                   | 2.31                                     |
| Aromatic Ring     | Aromatic Ring          | 1.80%    | 6143           | 4999                               | 18463                             | 0.27                                   | 1.23                                     |
| Amide Group       | Aromatic Ring          | 1.40%    | 4775           | 3847                               | 18463                             | 0.21                                   | 1.24                                     |
| Aromatic Ring     | Amide Group            | 0.32%    | 1087           | 930                                | 6982                              | 0.13                                   | 1.17                                     |
| Acceptor          | Donor                  | 6.69%    | 22861          | 14692                              | 23068                             | 0.64                                   | 1.56                                     |
| Donor             | Acceptor               | 8.70%    | 29742          | 20889                              | 45843                             | 0.46                                   | 1.42                                     |
| Acceptor          | Halogen (Cl, Br, I)    | 0.22%    | 748            | 670                                | 2043                              | 0.33                                   | 1.12                                     |
| Negative          | Positive               | 0.67%    | 2274           | 1802                               | 4206                              | 0.43                                   | 1.26                                     |
| Positive          | Negative               | 1.68%    | 5757           | 4024                               | 8427                              | 0.48                                   | 1.43                                     |
| Aromatic Ring     | Positive               | 0.16%    | 546            | 429                                | 4206                              | 0.10                                   | 1.27                                     |
| Positive          | Aromatic Ring          | 0.61%    | 2077           | 1507                               | 18463                             | 0.08                                   | 1.38                                     |

**Table S3.** Residues frequencies in the PDBbind complexes.

| <b>Residue Name</b> | <b>N</b> |
|---------------------|----------|
| LEU                 | 15946    |
| GLY                 | 14757    |
| VAL                 | 12227    |
| ASP                 | 11081    |
| ILE                 | 10659    |
| TYR                 | 10523    |
| PHE                 | 10180    |
| ALA                 | 9418     |
| SER                 | 9182     |
| GLU                 | 8370     |
| HIS                 | 7897     |
| THR                 | 7864     |
| ARG                 | 6948     |
| ASN                 | 5997     |
| MET                 | 5770     |
| LYS                 | 5657     |
| TRP                 | 5203     |
| GLN                 | 4654     |
| PRO                 | 4539     |
| CYS                 | 3618     |

**Table S4.** Non-covalent protein-ligand interactions and their parameters. The distances for aromatic rings and amide groups are measured relative to their centroids.  $\theta$  refers to an angle between the normal of the aromatic/amide plane and the vector between the aromatic ring centroid and the cation. For the hydrogen and halogen bonds, D is the donor atom covalently bound to the hydrogen/halogen; H/X is the hydrogen/halogen atom; A is an acceptor atom; Y is a heavy covalently bound neighbor of the acceptor atom. Multiple H-A-Y and X-A-Y angles may exist when there are more than one Y atoms in the structure. In such cases, the smallest angle is chosen. The minimal distances of favorable interactions is limited by the steric overlap threshold. The exceptions are the hydrogen bonds that might be nearly as short as the covalent bonds.

| Type                            | Interaction                | Orientation                | Distance range, Å | Angles range (degrees)                            |
|---------------------------------|----------------------------|----------------------------|-------------------|---------------------------------------------------|
| <b>Favorable interactions</b>   |                            |                            |                   |                                                   |
| Hydrophobic                     | (C, S) - (C, S, Cl, Br, I) |                            | < 4.5             |                                                   |
| Hydrophobic                     | (C, S) - (F)               |                            | < 3.9             |                                                   |
| Hydrophobic                     | Aromatic - Aromatic        | face-to-face (parallel)    | < 4.5             | $\theta \in \{-30,30\}$                           |
| Hydrophobic                     | Aromatic - Aromatic        | edge-to-face (T-shaped)    | < 5.5             | $\theta \in \{60,120\}$                           |
| Hydrophobic                     | Aromatic - Amide           | face-to-face (parallel)    | < 4.5             | $\theta \in \{-30,30\}$                           |
| Hydrophobic                     | Aromatic - Amide           | edge-to-face (T-shaped)    | < 5.0             | $\theta \in \{60,120\}$                           |
| Hydrogen Bond                   | Donor - Acceptor           |                            | {2.5,3.9}         | $\angle D-H-A \geq 90$<br>$\angle H-A-Y \geq 90$  |
| Halogen Bond                    | Cl, Br, I - Acceptor       |                            | < 4.0             | $\angle D-X-A \geq 120$<br>$\angle X-A-Y \geq 75$ |
| Electrostatic                   | Positive - Negative        |                            | {3.4,4.5}         |                                                   |
| Electrostatic                   | Positive - Aromatic        | face-to-face (above plane) | {3.4,4.5}         | $\theta \in \{-40,40\}$                           |
| <b>Unfavorable interactions</b> |                            |                            |                   |                                                   |
|                                 | Donor - Donor              |                            | < 3.4             |                                                   |
|                                 | Acceptor - Acceptor        |                            | < 3.2             |                                                   |
|                                 | Positive - Positive        |                            | < 5.2             |                                                   |
|                                 | Negative - Negative        |                            | < 5.2             |                                                   |
